# Supplementary material for: Concordance and discordance of sequence survey methods for molecular epidemiology
Source: PeerJ. 2015 Feb 17;3:e761. doi: 10.7717/peerj.761 (PMC4338773; doi:10.7717/peerj.761)
Supplement: File S1 [file peerj-03-761-s003.xlsx]

## Sheet: Summary
	SPECIES	ACCESSION	# isolates
	Yersinia pestis	SRP022877	20
	Brucella spp.	SRP022862	20
	Burkholderia pseudomallei	SRP023117	20
	If you want all isolates from any of these species simply go to NCBI --> SRA--> Input the accession number
	If you want particular isolates, browse the sheets in this spreadsheet and look for sample accession numbers (SRSXXXXXX)
	For every species there is a study accession number. Within studies there are samples (biological), then experiments, and finally runs (where data are)

## Sheet: Yersinia pestis
	SPECIES	TYPE	ALIAS	ACCESSION
	Yersinia pestis	STUDY	PRJNA194125	SRP022877
	Yersinia pestis	SAMPLE	SAMN01991269	SRS424521
	Yersinia pestis	EXPERIMENT	Yersinia pestis 4954	SRX282065
	Yersinia pestis	RUN	Yersinia pestis 4954 data	SRR857242
	Yersinia pestis	SAMPLE	SAMN01991268	SRS424546
	Yersinia pestis	EXPERIMENT	Yersinia pestis 1901b	SRX282089
	Yersinia pestis	RUN	Yersinia pestis 1901b data	SRR857243
	Yersinia pestis	SAMPLE	SAMN01991267	SRS424547
	Yersinia pestis	EXPERIMENT	Yersinia pestis Java (D88)	SRX282090
	Yersinia pestis	RUN	Yersinia pestis Java (D88) data	SRR857244
	Yersinia pestis	SAMPLE	SAMN01991266	SRS424548
	Yersinia pestis	EXPERIMENT	Yersinia pestis Kimberley (D17)	SRX282091
	Yersinia pestis	RUN	Yersinia pestis Kimberley (D17) data	SRR857245
	Yersinia pestis	SAMPLE	SAMN01991265	SRS424549
	Yersinia pestis	EXPERIMENT	Yersinia pestis KUMA (D11)	SRX282092
	Yersinia pestis	RUN	Yersinia pestis KUMA (D11) data	SRR857246
	Yersinia pestis	SAMPLE	SAMN01991264	SRS424550
	Yersinia pestis	EXPERIMENT	Yersinia pestis TS (D5)	SRX282093
	Yersinia pestis	RUN	Yersinia pestis TS (D5) data	SRR857248
	Yersinia pestis	SAMPLE	SAMN01991263	SRS424551
	Yersinia pestis	EXPERIMENT	Yersinia pestis 8607116	SRX282094
	Yersinia pestis	RUN	Yersinia pestis 8607116 data	SRR857255
	Yersinia pestis	SAMPLE	SAMN01991262	SRS424552
	Yersinia pestis	EXPERIMENT	Yersinia pestis 1866	SRX282095
	Yersinia pestis	RUN	Yersinia pestis 1866	SRR857261
	Yersinia pestis	SAMPLE	SAMN01991261	SRS424553
	Yersinia pestis	EXPERIMENT	Yersinia pestis 4139	SRX282096
	Yersinia pestis	RUN	Yersinia pestis 4139	SRR857262
	Yersinia pestis	SAMPLE	SAMN01991270	SRS429117
	Yersinia pestis	EXPERIMENT	Yersinia pestis 4412	SRX286281
	Yersinia pestis	RUN	Yersinia pestis 4412 data	SRR867046
	Yersinia pestis	SAMPLE	SAMN01991271	SRS429118
	Yersinia pestis	EXPERIMENT	Yersinia pestis 2965	SRX286283
	Yersinia pestis	RUN	Yersinia pestis 2965 data	SRR867047
	Yersinia pestis	SAMPLE	SAMN01991272	SRS429125
	Yersinia pestis	EXPERIMENT	Yersinia pestis 2055	SRX286290
	Yersinia pestis	RUN	Yersinia pestis 2055 data	SRR867048
	Yersinia pestis	SAMPLE	SAMN01991273	SRS429126
	Yersinia pestis	EXPERIMENT	Yersinia pestis 2106	SRX286302
	Yersinia pestis	RUN	Yersinia pestis 2106 data	SRR867059
	Yersinia pestis	SAMPLE	SAMN01991274	SRS429127
	Yersinia pestis	EXPERIMENT	Yersinia pestis 2772	SRX286303
	Yersinia pestis	RUN	Yersinia pestis 2772 data	SRR867060
	Yersinia pestis	SAMPLE	SAMN01991276	SRS429128
	Yersinia pestis	EXPERIMENT	Yersinia pestis AS 2509	SRX286305
	Yersinia pestis	RUN	Yersinia pestis AS 2509 data	SRR867064
	Yersinia pestis	SAMPLE	SAMN01991275	SRS429129
	Yersinia pestis	EXPERIMENT	Yersinia pestis 3357	SRX286304
	Yersinia pestis	RUN	Yersinia pestis 3357 data	SRR867063
	Yersinia pestis	SAMPLE	SAMN01991277	SRS429130
	Yersinia pestis	EXPERIMENT	Yersinia pestis AS 200900596	SRX286306
	Yersinia pestis	RUN	Yersinia pestis AS 200900596 data	SRR867067
	Yersinia pestis	SAMPLE	SAMN01991278	SRS429131
	Yersinia pestis	EXPERIMENT	Yersinia pestis V-6486	SRX286307
	Yersinia pestis	RUN	Yersinia pestis V-6486	SRR867068
	Yersinia pestis	SAMPLE	SAMN01991279	SRS429133
	Yersinia pestis	EXPERIMENT	Yersinia pestis KIM D27	SRX286340
	Yersinia pestis	RUN	Yersinia pestis KIM D27 data	SRR867106
	Yersinia pestis	SAMPLE	SAMN01991280	SRS429134
	Yersinia pestis	EXPERIMENT	Yersinia pestis AS200901509	SRX286341
	Yersinia pestis	RUN	Yersinia pestis AS200901509 data	SRR867111

## Sheet: Brucella species
	SPECIES	TYPE	ALIAS	ACCESSION
	Brucella spp.	STUDY	PRJNA194124	SRP022862
	Brucella abortus	SAMPLE	SAMN01990978	SRS421501
	Brucella abortus	EXPERIMENT	Brucella abortus 2032	SRX278648
	Brucella abortus	RUN	Brucella abortus 2032 data	SRR852269
	Brucella abortus	SAMPLE	SAMN01990979	SRS421628
	Brucella abortus	EXPERIMENT	Brucella abortus 2045	SRX278790
	Brucella abortus	RUN	Brucella abortus 2045 data	SRR852272
	Brucella abortus	SAMPLE	SAMN01990980	SRS421629
	Brucella abortus	EXPERIMENT	Brucella abortus 2038	SRX278791
	Brucella abortus	RUN	Brucella abortus 2038	SRR852273
	Brucella abortus	SAMPLE	SAMN01990981	SRS421634
	Brucella abortus	EXPERIMENT	Brucella abortus 2073	SRX278792
	Brucella abortus	RUN	Brucella abortus 2073 data	SRR852274
	Brucella abortus	SAMPLE	SAMN01990982	SRS421635
	Brucella abortus	EXPERIMENT	Brucella abortus 8-953	SRX278793
	Brucella abortus	RUN	Brucella abortus 8-953 data	SRR852275
	Brucella abortus	SAMPLE	SAMN01990983	SRS421636
	Brucella abortus	EXPERIMENT	Brucella abortus 00-666	SRX278794
	Brucella abortus	RUN	Brucella abortus 00-666 data	SRR852276
	Brucella abortus	SAMPLE	SAMN01990984	SRS421694
	Brucella abortus	EXPERIMENT	Brucella abortus Yell-99-067	SRX278891
	Brucella abortus	RUN	Brucella abortus Yell-99-067 data	SRR852399
	Brucella abortus	SAMPLE	SAMN01990985	SRS424489
	Brucella abortus	EXPERIMENT	Brucella abortus str. Weinheimer 4	SRX282032
	Brucella abortus	RUN	Brucella abortus str. Weinheimer 4 data	SRR857202
	Brucella canis	SAMPLE	SAMN01990986	SRS424496
	Brucella canis	EXPERIMENT	Brucella canis 1107	SRX282039
	Brucella canis	RUN	Brucella canis 1107	SRR857209
	Brucella melitensis	SAMPLE	SAMN01990987	SRS424497
	Brucella melitensis	EXPERIMENT	Brucella melitensis 1253 Esther	SRX282040
	Brucella melitensis	RUN	Brucella melitensis 1253 Esther data	SRR857210
	Brucella melitensis	SAMPLE	SAMN01990988	SRS424498
	Brucella melitensis	EXPERIMENT	Brucella melitensis BA 4837	SRX282041
	Brucella melitensis	RUN	Brucella melitensis BA 4837 data	SRR857211
	Brucella melitensis	SAMPLE	SAMN01990989	SRS424499
	Brucella melitensis	EXPERIMENT	Brucella melitensis 70000565	SRX282042
	Brucella melitensis	RUN	Brucella melitensis 70000565 data	SRR857212
	Brucella melitensis	SAMPLE	SAMN01990990	SRS424501
	Brucella melitensis	EXPERIMENT	Brucella melitensis 80600020	SRX282044
	Brucella melitensis	RUN	Brucella melitensis 80600020 data	SRR857213
	Brucella melitensis	SAMPLE	SAMN01990991	SRS424502
	Brucella melitensis	EXPERIMENT	Brucella melitensis 80800076	SRX282045
	Brucella melitensis	RUN	Brucella melitensis 80800076 data	SRR857215
	Brucella neotomae	SAMPLE	SAMN01990992	SRS424503
	Brucella neotomae	EXPERIMENT	Brucella neotomae 5K33	SRX282046
	Brucella neotomae	RUN	Brucella neotomae 5K33	SRR857216
	Brucella ovis	SAMPLE	SAMN01990993	SRS424504
	Brucella ovis	EXPERIMENT	Brucella ovis 1-507	SRX282047
	Brucella ovis	RUN	Brucella ovis 1-507 data	SRR857217
	Brucella ovis	SAMPLE	SAMN01990994	SRS424505
	Brucella ovis	EXPERIMENT	Brucella ovis 13551-2114	SRX282048
	Brucella ovis	RUN	Brucella ovis 13551-2114 data	SRR857218
	Brucella sp.	SAMPLE	SAMN01990995	SRS424507
	Brucella sp.	EXPERIMENT	Brucella sp. 70100304	SRX282050
	Brucella sp.	RUN	Brucella sp. 70100304 data	SRR857220
	Brucella suis	SAMPLE	SAMN01990996	SRS424510
	Brucella suis	EXPERIMENT	Brucella suis 2483	SRX282053
	Brucella suis	RUN	Brucella suis 2483 data	SRR857223
	Brucella suis	SAMPLE	SAMN01990997	SRS424513
	Brucella suis	EXPERIMENT	Brucella suis 1-138	SRX282057
	Brucella suis	RUN	Brucella suis 1-138 data	SRR857227

## Sheet: Burkholderia pseudomallei
	SPECIES	TYPE	ALIAS	ACCESSION
	Burkholderia pseudomallei	STUDY	PRJNA194126	SRP023117
	Burkholderia pseudomallei	SAMPLE	SAMN01991021	SRS429136
	Burkholderia pseudomallei	EXPERIMENT	Burkholderia pseudomallei 5(1949)	SRX286342
	Burkholderia pseudomallei	RUN	Burkholderia pseudomallei 5(1949) data	SRR867120
	Burkholderia pseudomallei	SAMPLE	SAMN01991040	SRS429137
	Burkholderia pseudomallei	EXPERIMENT	Burkholderia pseudomallei 80800117	SRX286344
	Burkholderia pseudomallei	RUN	Burkholderia pseudomallei 80800117 data	SRR867121
	Burkholderia pseudomallei	SAMPLE	SAMN01991024	SRS429179
	Burkholderia pseudomallei	EXPERIMENT	Burkholderia pseudomallei 18(1990)	SRX286345
	Burkholderia pseudomallei	RUN	Burkholderia pseudomallei 18(1990)	SRR867123
	Burkholderia pseudomallei	SAMPLE	SAMN01991023	SRS429180
	Burkholderia pseudomallei	EXPERIMENT	Burkholderia pseudomallei 9(1988)	SRX286346
	Burkholderia pseudomallei	RUN	Burkholderia pseudomallei 9(1988) data	SRR867124
	Burkholderia pseudomallei	SAMPLE	SAMN01991022	SRS429181
	Burkholderia pseudomallei	EXPERIMENT	Burkholderia pseudomallei 6(1960)	SRX286347
	Burkholderia pseudomallei	RUN	Burkholderia pseudomallei 6(1960) data	SRR867125
	Burkholderia pseudomallei	SAMPLE	SAMN01991030	SRS429182
	Burkholderia pseudomallei	EXPERIMENT	Burkholderia pseudomallei 68(1992)	SRX286348
	Burkholderia pseudomallei	RUN	Burkholderia pseudomallei 68(1992) data	SRR867126
	Burkholderia pseudomallei	SAMPLE	SAMN01991029	SRS429183
	Burkholderia pseudomallei	EXPERIMENT	Burkholderia pseudomallei 35(1963)	SRX286350
	Burkholderia pseudomallei	RUN	Burkholderia pseudomallei 35(1963)	SRR867132
	Burkholderia pseudomallei	SAMPLE	SAMN01991028	SRS429184
	Burkholderia pseudomallei	EXPERIMENT	Burkholderia pseudomallei 33(1976)	SRX286352
	Burkholderia pseudomallei	RUN	Burkholderia pseudomallei 33(1976) data	SRR867133
	Burkholderia pseudomallei	SAMPLE	SAMN01991027	SRS429185
	Burkholderia pseudomallei	EXPERIMENT	Burkholderia pseudomallei 31(1992)	SRX286353
	Burkholderia pseudomallei	RUN	Burkholderia pseudomallei 31(1992) data	SRR867134
	Burkholderia pseudomallei	SAMPLE	SAMN01991026	SRS429186
	Burkholderia pseudomallei	EXPERIMENT	Burkholderia pseudomallei 25(1977)	SRX286354
	Burkholderia pseudomallei	RUN	Burkholderia pseudomallei 25(1977) data	SRR867135
	Burkholderia pseudomallei	SAMPLE	SAMN01991025	SRS429189
	Burkholderia pseudomallei	EXPERIMENT	Burkholderia pseudomallei 24(1976)	SRX286357
	Burkholderia pseudomallei	RUN	Burkholderia pseudomallei 24(1976) data	SRR867136
	Burkholderia pseudomallei	SAMPLE	SAMN01991031	SRS429191
	Burkholderia pseudomallei	EXPERIMENT	Burkholderia pseudomallei 91(1984)	SRX286359
	Burkholderia pseudomallei	RUN	Burkholderia pseudomallei 91(1984) data	SRR867137
	Burkholderia pseudomallei	SAMPLE	SAMN01991032	SRS429193
	Burkholderia pseudomallei	EXPERIMENT	Burkholderia pseudomallei 104(1990)	SRX286361
	Burkholderia pseudomallei	RUN	Burkholderia pseudomallei 104(1990) data	SRR867138
	Burkholderia pseudomallei	SAMPLE	SAMN01991033	SRS429195
	Burkholderia pseudomallei	EXPERIMENT	Burkholderia pseudomallei 208(1990)	SRX286363
	Burkholderia pseudomallei	RUN	Burkholderia pseudomallei 208(1990) data	SRR867156
	Burkholderia pseudomallei	SAMPLE	SAMN01991034	SRS429196
	Burkholderia pseudomallei	EXPERIMENT	Burkholderia pseudomallei 4075(1999)	SRX286364
	Burkholderia pseudomallei	RUN	Burkholderia pseudomallei 4075(1999) data	SRR867158
	Burkholderia pseudomallei	SAMPLE	SAMN01991035	SRS429242
	Burkholderia pseudomallei	EXPERIMENT	Burkholderia pseudomallei Darwin-035	SRX286418
	Burkholderia pseudomallei	RUN	Burkholderia pseudomallei Darwin-035 data	SRR867262
	Burkholderia pseudomallei	SAMPLE	SAMN01991036	SRS429243
	Burkholderia pseudomallei	EXPERIMENT	Burkholderia pseudomallei Darwin-051	SRX286420
	Burkholderia pseudomallei	RUN	Burkholderia pseudomallei Darwin-051 data	SRR867266
	Burkholderia pseudomallei	SAMPLE	SAMN01991037	SRS429244
	Burkholderia pseudomallei	EXPERIMENT	Burkholderia pseudomallei Darwin-060	SRX286421
	Burkholderia pseudomallei	RUN	Burkholderia pseudomallei Darwin-060 data	SRR867267
	Burkholderia pseudomallei	SAMPLE	SAMN01991038	SRS429245
	Burkholderia pseudomallei	EXPERIMENT	Burkholderia pseudomallei Darwin-077	SRX286422
	Burkholderia pseudomallei	RUN	Burkholderia pseudomallei Darwin-077 data	SRR867268
	Burkholderia pseudomallei	SAMPLE	SAMN01991039	SRS429246
	Burkholderia pseudomallei	EXPERIMENT	Burkholderia pseudomallei Darwin-150	SRX286423
	Burkholderia pseudomallei	RUN	Burkholderia pseudomallei Darwin-150 data	SRR867269
